# Supplementary material
Source: Springer Nature journal article supplement (https://www.springermedizin.de/resource/supplementary/12935_2009_208_MOESM9_ESM.pdf/9541376)

**MCF-10AT**

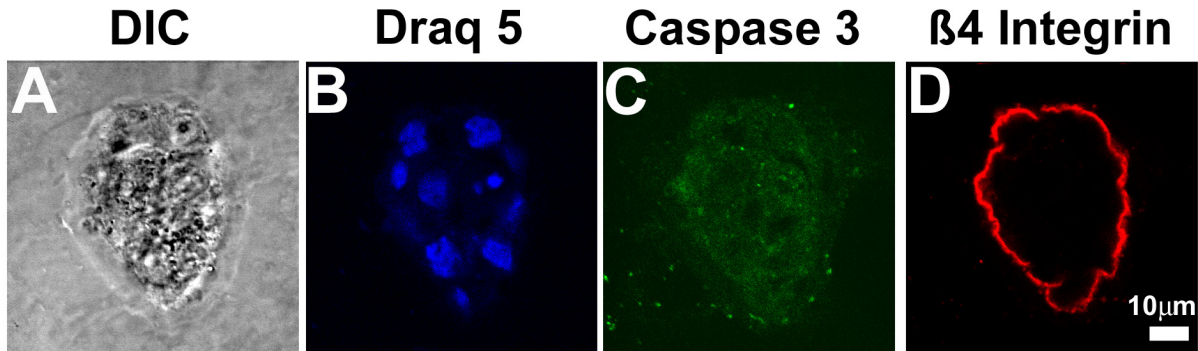

**MCF-10AT**

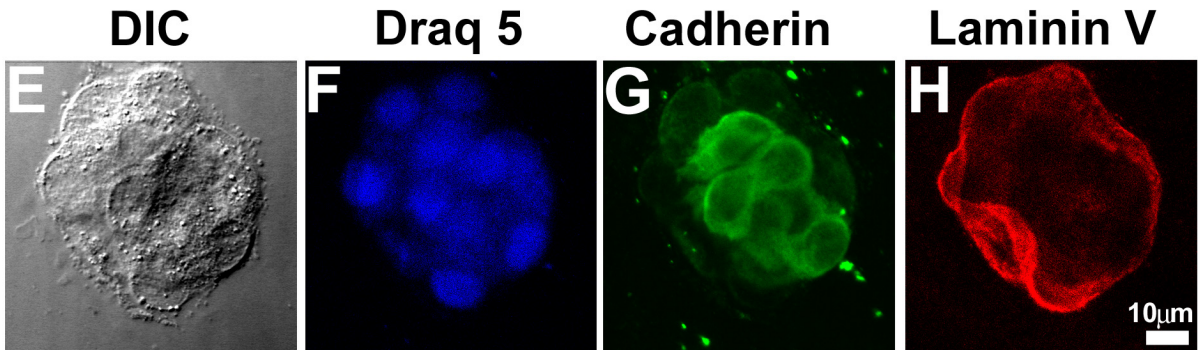

Supplement: MOESM9 [file 9541376]
